# Supplementary material for: Rapid room-temperature synthesis of silver nanoplates with tunable in-plane surface plasmon resonance from visible to near-IR
Source: Royal Society of Chemistry journal article supplement (doi:10.1039/b800691a), 2008-01-01
Supplement: b800691a.pdf [file b800691a.pdf]

## **Rapid Room-Temperature Synthesis of Silver Nanoplates with Tunable Inplane Surface Plasmon Resonance from Visible to Near-IR†**

**Zongwei Cao,<sup>ab</sup> Hongbing Fu,<sup>\*a</sup> Longtian Kang,<sup>a</sup> Liwei Huang,<sup>ab</sup> Tianyou Zhai,<sup>ab</sup> Ying  
Ma,<sup>a</sup> and Jiannian Yao<sup>\*a</sup>**

<sup>a</sup>Beijing National Laboratory for Molecular Sciences (BNLMS), Institute of Chemistry, Chinese Academy of Sciences,  
Zhongguancun,  
Beijing, 100080, P.R. China.

<sup>b</sup>Graduate School of Chinese Academy of Science, Beijing, 100039, P.R.China

**E-mail:** [hongbing.fu@iccas.ac.cn](mailto:hongbing.fu@iccas.ac.cn) and [jnyao@iccas.ac.cn](mailto:jnyao@iccas.ac.cn)

**Additional TEM images showing the thickness of nanoplates.**

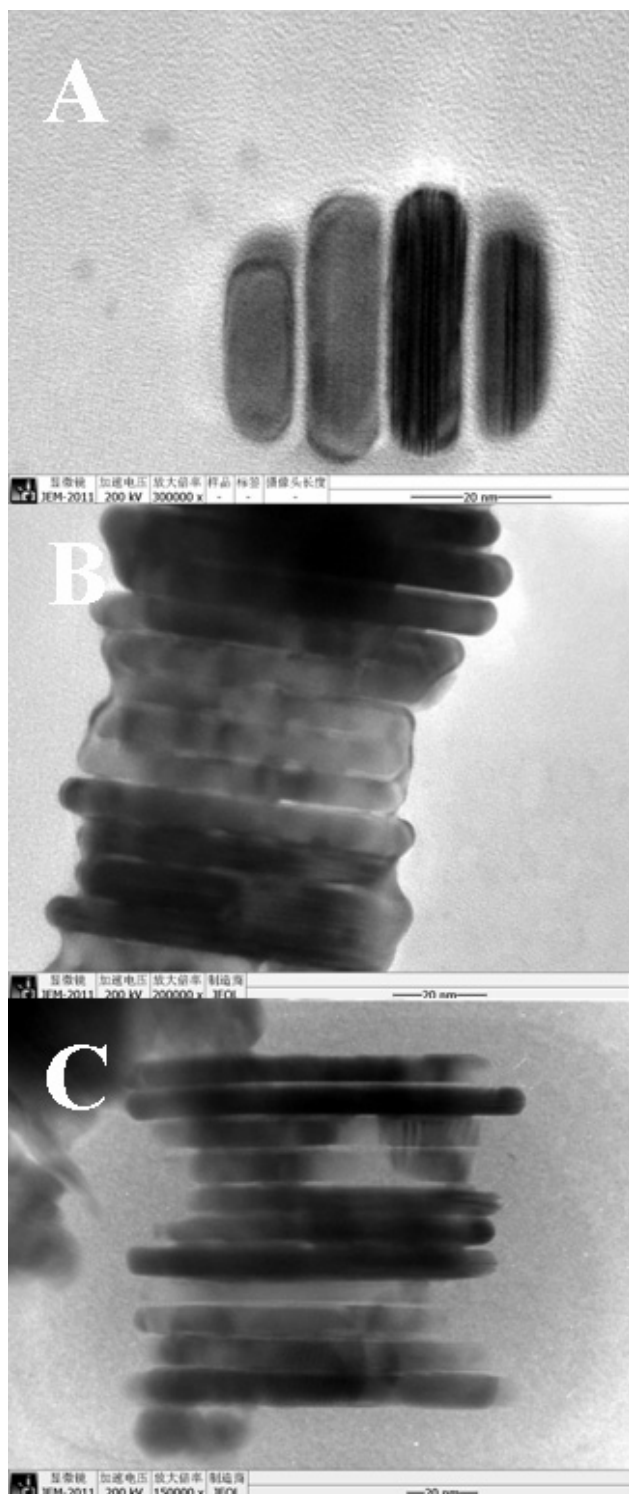

**Figure S1.** TEM images of silver nanoplates self-assembled into one-dimensional stacks, showing the effect of EDTA quantity on the thickness of nanoplates (A)  $V_{\text{EDTA}} = 30$ , (B) 50, and (C) 70  $\mu\text{L}$ , respectively.

**Effect of TSC**

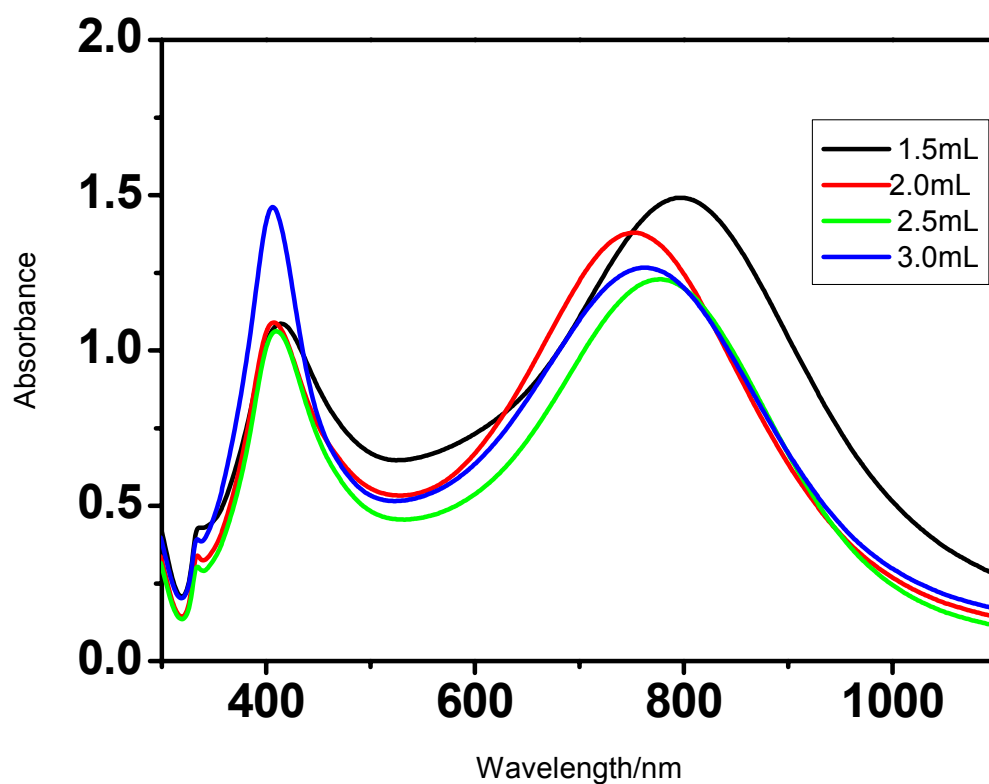

**Figure S2.** UV-vis spectra of different concentration of TSC (25 mL saturation solution silver oxide, 0.1M, 60 $\mu$ L EDTA and 0.1 M, 100 $\mu$ L N<sub>2</sub>H<sub>4</sub>)
